# Supplementary material for: Versatile Vessel-on-a-Chip Platform for Studying Key Features of Blood Vascular Tumors
Source: Bioengineering (Basel). 2021 Jun 9;8(6):81. doi: 10.3390/bioengineering8060081 (PMC8226980; doi:10.3390/bioengineering8060081)
Supplement: Supplementary file 1 [file bioengineering-08-00081-s001.zip]

Archive with 6 entries (6 files):
- Caballero_et_al_Supporting_Information2.pdf
- MOVIE_S1_Beads_Blood.avi
- Movie_S2_Curved_channel.avi
- MOVIE_S3_hemorrhagae_Caballero_et_al.avi
- MOVIE_S4_Bleed_Clot_Caballero_et_al.avi
- MOVIE_S5_thrombus_Caballero_et_al.avi
